# Supplementary material for: A multi-functional chromone-modified polyethylene obtained by metal-free C–H activation
Source: Royal Society of Chemistry journal article supplement (doi:10.1039/d1py01604k), 2022-01-01
Supplement: d1py01604k1.pdf [file d1py01604k1.pdf]

## Supplementary Information

### A Multi-functional Chromone-modified Polyethylene via Metal-free C–H Activation

Yongjie Zhang<sup>a,b</sup>, Xiaopei Li<sup>a,b</sup>, Wenqin Zhu<sup>c</sup>, Pibo Liu<sup>a</sup>, Juntao Ren<sup>a</sup>, Shangtao Chen<sup>c</sup>, Yanming Hu<sup>a\*</sup>, Guangyuan Zhou<sup>a\*</sup>

<sup>a</sup> Division of Energy Materials, Dalian Institute of Chemical Physics, Chinese Academy of Sciences, Dalian 116023, China

<sup>b</sup> Dalian Polytechnic University, Dalian 116034, China

<sup>c</sup> Petrochemical Research Institute, PetroChina, Beijing 102206, China

\* Corresponding authors: Yanming Hu (ymhu@dicp.ac.cn) and Guangyuan Zhou (gyzhou@dicp.ac.cn)

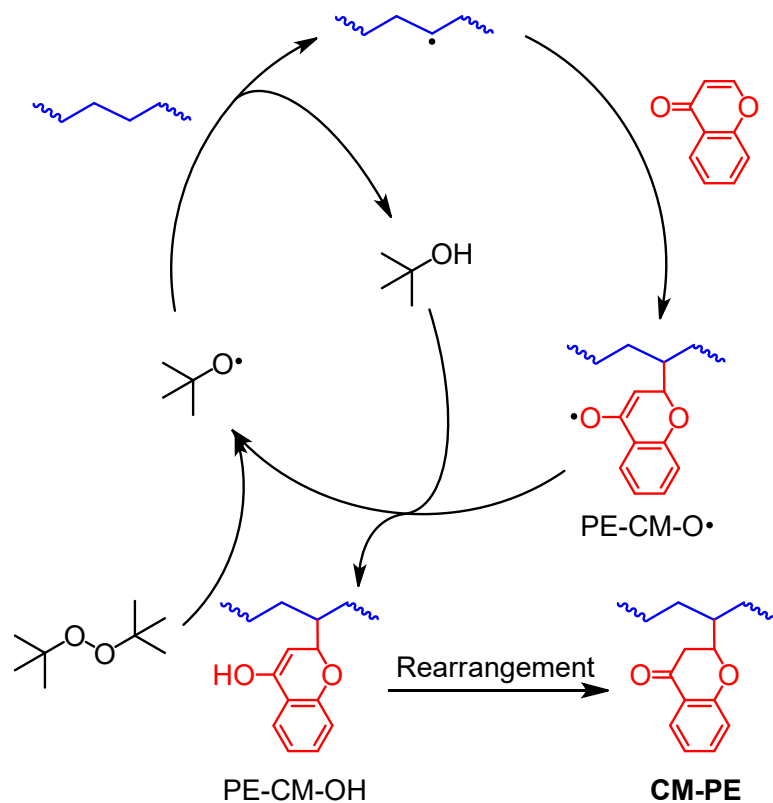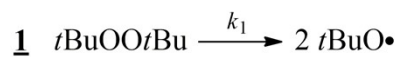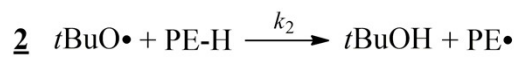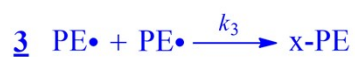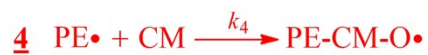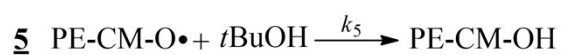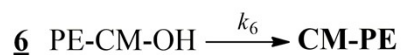

|                                                                                                                                                                      |
|----------------------------------------------------------------------------------------------------------------------------------------------------------------------|
| $k_3 = k_c$<br>Rate of crosslinking:<br>$R_c = k_c [\text{PE}^*][\text{PE}^*]$<br>$k_4 = k_f$<br>Rate of functionalization<br>$R_c = k_c [\text{PE}^*][\text{PE}^*]$ |
|----------------------------------------------------------------------------------------------------------------------------------------------------------------------|

**Scheme S1** Proposed mechanism and elementary reactions for the synthesis of CM-

PE

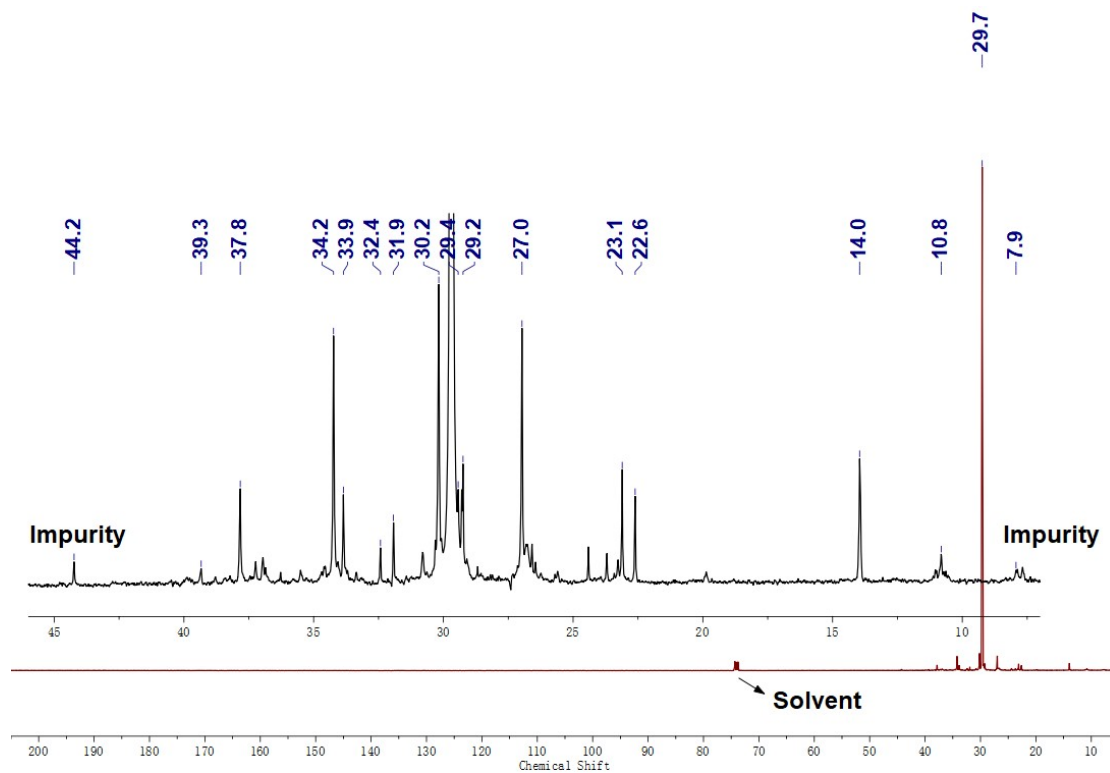

**Figure S1** Typical  $^{13}\text{C}$  NMR spectrum of precursor PE (1,1,2,2-tetrachloroethane- $d_2$ ). Resonance peaks assigned according to the reference, *Macromolecules* 2002, 35, 2, 339–345. Detailed assignments were shown in **Table S1**.

**Table S1** Carbon-13 chemical shifts and assignments for precursor PE

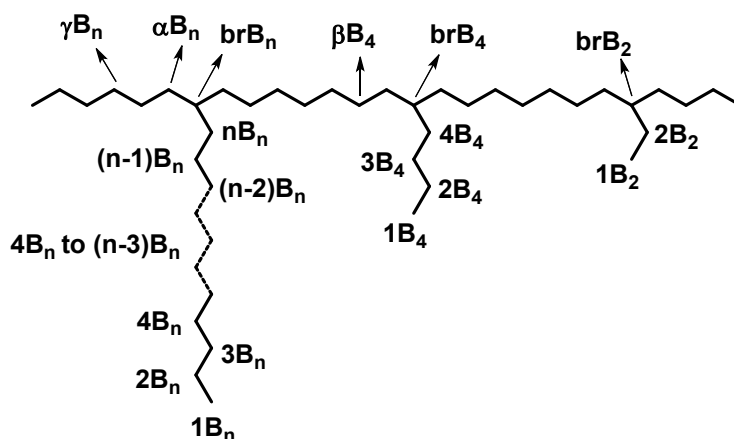

| chemical shift (ppm) | assignments                                                               | chemical shift (ppm) | assignments                                                                             |
|----------------------|---------------------------------------------------------------------------|----------------------|-----------------------------------------------------------------------------------------|
| 10.8                 | 1B <sub>2</sub>                                                           | 29.7                 | CH <sub>2</sub> (main chain)                                                            |
| 14.0                 | 1B <sub>4</sub> , 1B <sub>n</sub> (n ≥ 6)                                 | 30.2                 | γB <sub>2</sub> , γB <sub>4</sub> , γB <sub>n</sub> , (n-2)B <sub>n</sub>               |
| 22.6                 | 2B <sub>n</sub>                                                           | 31.9                 | uncertain                                                                               |
| 23.1                 | 2B <sub>4</sub>                                                           | 32.4                 | 3B <sub>n</sub>                                                                         |
| 27.0                 | 2B <sub>2</sub> , βB <sub>2</sub> , βB <sub>n</sub> , (n-1)B <sub>n</sub> | 34.2                 | αB <sub>2</sub> , 4B <sub>4</sub> , αB <sub>4</sub> , αB <sub>n</sub> , nB <sub>n</sub> |
| 29.2                 | 3B <sub>4</sub>                                                           | 37.8                 | brB <sub>4</sub> , brB <sub>n</sub>                                                     |
| 29.4                 | 4B <sub>n</sub>                                                           | 39.3                 | brB <sub>2</sub>                                                                        |

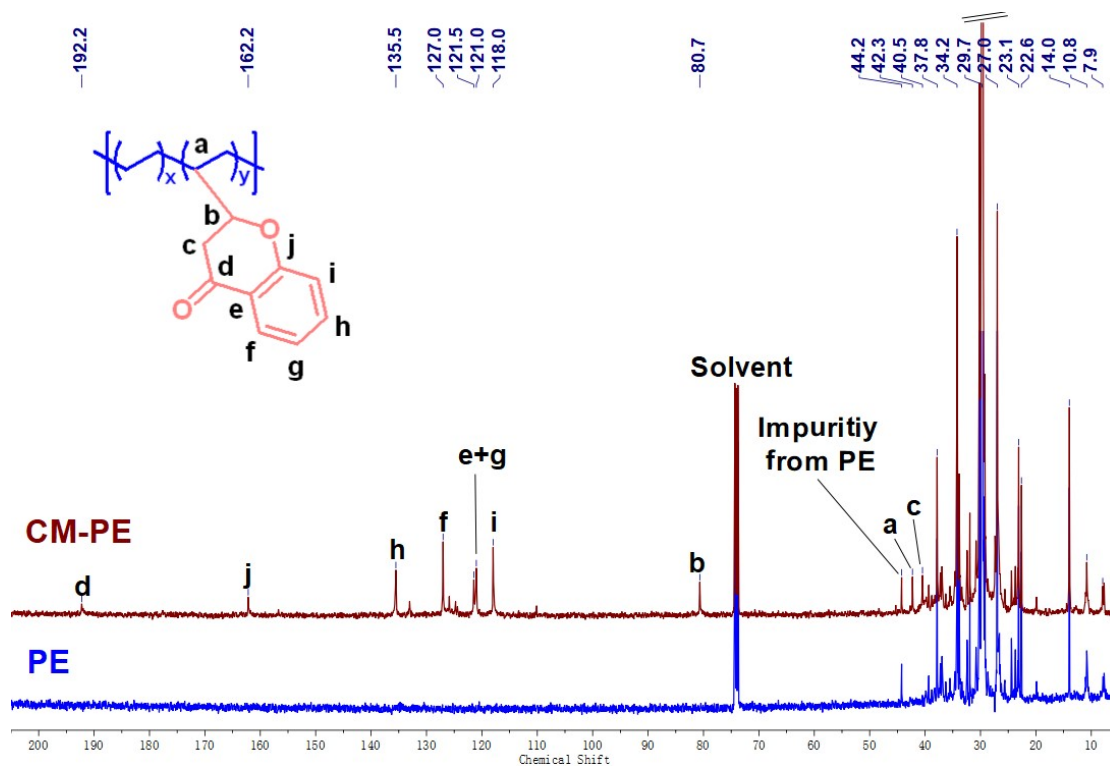

**Figure S2**  $^{13}\text{C}$  NMR spectra of the typical CM-PE (1,1,2,2-tetrachloroethane- $d_2$ , Entry 6 in Table 1) and the original PE.

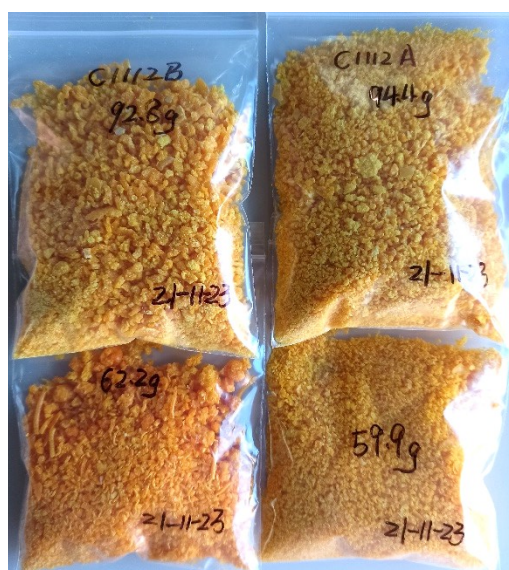

**Figure S3** Scale-up synthesis of hundreds grams of CM-PE under the solvent-free conditions

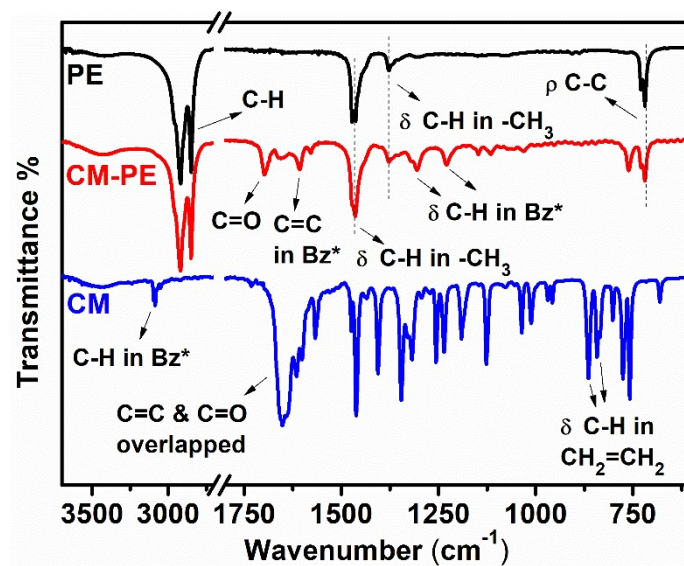

**Figure S4** Typical FTIR spectra of PE, CM-PE, and chromone (CM). Symbols  $\delta$  and  $\rho$  stand for bending and rocking, respectively. Absorption peaks without symbol are due to bond stretching. Characteristic peaks for PE, CM-PE, and chromone are listed in **Table S2**.

**Table S2** Characteristic peaks for PE, CM-PE, and chromone in FTIR

| Peak (cm <sup>-1</sup> ) | Bond                                                 | Description                 | Sample |
|--------------------------|------------------------------------------------------|-----------------------------|--------|
| 2919, 2850               | C-H                                                  | Stretching                  | PE     |
| 1474, 1464               | C-H                                                  | Bending, in CH <sub>2</sub> |        |
| 1378                     | C-H                                                  | Bending, in CH <sub>3</sub> |        |
| 720                      | C-C in (CH <sub>2</sub> ) <sub>n</sub> , n>6         | Rocking                     |        |
| 1698                     | C=O                                                  | Stretching                  |        |
| 1607                     | C=C in benzene ring                                  | Stretching                  | CM-PE  |
| 1306, 1229               | C-H in benzene ring                                  | Bending                     |        |
| 3086                     | C-H in benzene ring                                  | Stretching                  |        |
| 1652                     | C=C & C=O<br>(overlapping due to<br>conjunction)     | Stretching                  | CM     |
| 865, 843                 | C-H in -CH=CH <sub>2</sub><br>(Disappeared in CM-PE) | Bending                     |        |

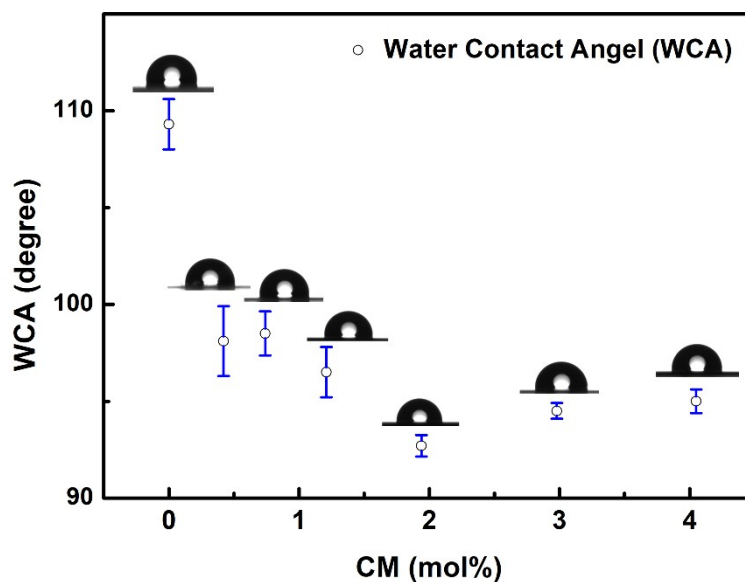**Figure S5** Water contact angles of parent PE and CM-PE

**Table S3** Functionalization of PE with CM catalyzed by DTBP

| Entry           | T/°C | t/h  | NAP. <sup>a</sup> | CM/DBTP<br>/PE <sub>100</sub> <sup>b</sup> | CM <sup>c</sup><br>(mol%) | M <sub>n</sub> <sup>d</sup><br>(g/mol) | <i>D</i> <sup>d</sup> | ΔH <sub>m</sub> <sup>e</sup><br>(J/g) | T <sub>m</sub><br>(°C) | ΔH <sup>e</sup><br>(J/g) | T <sub>c</sub><br>(°C) |
|-----------------|------|------|-------------------|--------------------------------------------|---------------------------|----------------------------------------|-----------------------|---------------------------------------|------------------------|--------------------------|------------------------|
| PE              | –    | –    | –                 | –                                          | 0                         | 7460                                   | 2.30                  | 65.9                                  | 100.5/105.0            | 64.3                     | 90.8                   |
| 1               | 140  | 1    | 1                 | 10/5/1                                     | 1.21                      | 8950                                   | 3.9                   | 49.5                                  | 98.8                   | 49.8                     | 87.8                   |
| 2               | 140  | 1    | 1                 | 10/10/1                                    | 1.94                      | 9570                                   | 8.8                   | 44.4                                  | 91.8                   | 39.0                     | 76.8                   |
| 3               | 140  | 1    | 1                 | 15/10/1                                    | 1.57                      | 8600                                   | 5.9                   | 40.3                                  | 92.9                   | 40.3                     | 78.9                   |
| 4               | 140  | 1    | 1                 | 30/10/1                                    | 1.46                      | 8760                                   | 4.7                   | 42.5                                  | 93.2                   | 41.3                     | 78.6                   |
| 5               | 140  | 1    | 1                 | 50/10/1                                    | 0.74                      | 7980                                   | 3.0                   | 50.6                                  | 99.4                   | 49.6                     | 89.6                   |
| 6               | 140  | 2    | 1                 | 30/10/1                                    | 4.05                      | 8850                                   | 6.8                   | 48.0                                  | 93.2                   | 46.9                     | 79.4                   |
| 7               | 140  | 1    | 3                 | 50/10/1                                    | 0.61                      | 8430                                   | 2.2                   | 55.6                                  | 99.8                   | 51.3                     | 89.7                   |
| 8               | 140  | 5    | 3                 | 50/10/1                                    | 2.98                      | 7430                                   | 4.4                   | 34.7                                  | 87.5                   | 33.1                     | 72.1                   |
| 9               | 125  | 6    | 1                 | 30/10/1                                    | 0.50                      | 7600                                   | 2.7                   | 46.1                                  | 99.8                   | 43.3                     | 89.0                   |
| 10              | 140  | 1    | 0                 | 5/5/1                                      | 0.33                      | 12300                                  | 4.6                   | 49.7                                  | 98.7                   | 49.9                     | 88.2                   |
| 11              | 140  | 1    | 0                 | 10/5/1                                     | 0.42                      | 11980                                  | 4.8                   | 55.2                                  | 98.1                   | 53.0                     | 87.0                   |
| 12              | 140  | 1    | 0                 | 10/10/1                                    | 0.74                      | 13050                                  | 20.0                  | 52.9                                  | 94.4                   | 57.1                     | 81.2                   |
| 13              | 140  | 1    | 0                 | 15/10/1                                    | 1.09                      | 13870                                  | 9.4                   | 43.8                                  | 94.4                   | 45.4                     | 80.5                   |
| 14              | 125  | 1    | 0                 | 15/10/1                                    | 0.44                      | 8190                                   | 2.3                   | 59.0                                  | 100.8                  | 69.4                     | 89.1                   |
| 15              | 130  | 1    | 1                 | 30/10/1                                    | 0.53                      | 7590                                   | 2.3                   | 56.2                                  | 101.0                  | 53.4                     | 90.5                   |
| 16              | 150  | 0.75 | 1                 | 30/10/1                                    | 3.42                      | 9240                                   | 7.6                   | 34.4                                  | 90.4                   | 34.5                     | 74.4                   |
| 17 <sup>f</sup> | 125  | 0.25 | 0                 | 15/10/1                                    | 0.18                      | 7440                                   | 1.8                   | 57.9                                  | 101.0                  | 52.7                     | 90.5                   |
| 18 <sup>f</sup> | 140  | 0.25 | 0                 | 30/10/1                                    | 0.19                      | 6840                                   | 1.9                   | 61.9                                  | 90.4                   | 54.4                     | 74.4                   |

<sup>a</sup> The weight ratios of naphthalene as a solvent to the precursor PE. <sup>b</sup> The molar ratios of CM and DTBP to 100 ethylene units. <sup>c</sup> CM graft ratio in



CM-PE. <sup>d</sup> GPC data. <sup>e</sup>  $\Delta H_m$  and  $\Delta H_c$  values were normalized to PE based on calculated weight ratios. <sup>f</sup> Reactive extrusion conditions.

**Table S4** TGA data for PE and CM-PEs

| Sample                            | $T_{5\%}$ (°C) | $T_{\text{onset}}$ (°C) |
|-----------------------------------|----------------|-------------------------|
| PE                                | 305.7          | 327.1                   |
| CM-PE0.50                         | 329.4          | 371.1                   |
| CM-PE0.74                         | 336.5          | 374.7                   |
| CM-PE1.21                         | 334.4          | 372.4                   |
| CM-PE1.94                         | 329.8          | 386.7                   |
| CM-PE2.98                         | 331.7          | 391.2                   |
| CM-PE4.05                         | 344.3          | 393.8                   |
| LDPE                              | 297.9          | 318.4                   |
| LDPE/CM-PE4.05 Blend (90/10, w/w) | 308.4          | 344.8                   |

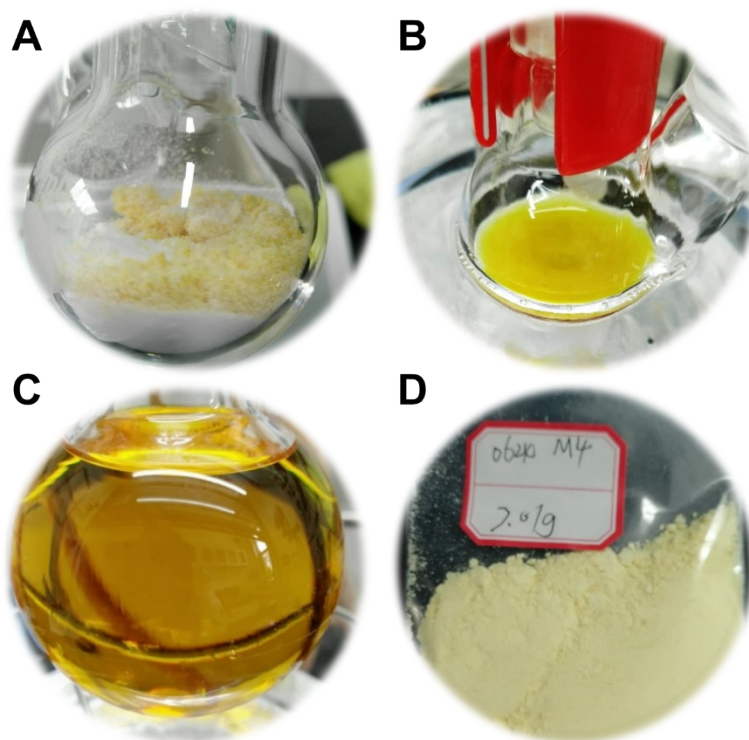

**Figure S6** Digital pictures illustrating solvent- and metal-free C-H activation of PE.

(A) A mixture of PE and chromone.

(B) After PE and chromone melting down, DTBP was injected into the mixture to start the reaction.

(C) CM-PE was dissolved in hot xylene and precipitated later using cold methanol. Picture shows that CM-PE was completely soluble in xylene.

(D) Grams of CM-PE in a bright yellow powder form was synthesized.
